# Metabolic activity of human blastocysts correlates with their morphokinetics, morphological grade, KIDScore and artificial intelligence ranking

Laura Ferrick<sup>1</sup>, Yee Shan Lisa Lee<sup>2</sup>, and David K. Gardner<sup>1,2,\*</sup>

<sup>1</sup>School of BioSciences, University of Melbourne, Melbourne, VIC 3010, Australia <sup>2</sup>Melbourne IVF, East Melbourne, Melbourne, VIC 3002, Australia

\*Correspondence address. School of BioSciences, University of Melbourne, Melbourne, VIC 3010, Australia. E-mail: david.gardner@unimelb.edu.au

Submitted on April 14, 2020; resubmitted on June 18, 2020; editorial decision on June 29, 2020

**STUDY QUESTION:** Is there a relationship between blastocyst metabolism and biomarkers of embryo viability?

**SUMMARY ANSWER:** Blastocysts with higher developmental potential and a higher probability of resulting in a viable pregnancy consume higher levels of glucose and exhibit distinct amino acid profiles.

**WHAT IS KNOWN ALREADY:** Morphological and morphokinetic analyses utilized in embryo selection provide insight into developmental potential, but alone are unable to provide a direct measure of embryo physiology and inherent health. Glucose uptake is a physiological biomarker of viability and amino acid utilization is different between embryos of varying qualities.

**STUDY DESIGN, SIZE, DURATION:** Two hundred and nine human preimplantation embryos from 50 patients were cultured in a time-lapse incubator system in both freeze all and fresh transfer cycles. A retrospective analysis of morphokinetics, morphology (Gardner grade), KIDScore, artificial intelligence grade (EmbryoScore), glucose and amino acid metabolism, and clinical pregnancies was conducted.

**PARTICIPANTS/MATERIALS, SETTING, METHODS:** ICSI was conducted in all patients, who were aged  $\leq 37$  years and previously had no more than two IVF cycles. Embryos were individually cultured in a time-lapse incubator system, and those reaching the blastocyst stage had their morphokinetics annotated and were each assigned a Gardner grade, KIDScore and EmbryoScore. Glucose and amino acid metabolism were measured. Clinical pregnancies were confirmed by the presence of a fetal heartbeat at 6 weeks of gestation.

**MAIN RESULTS AND THE ROLE OF CHANCE:** Glucose consumption was at least 40% higher in blastocysts deemed of high developmental potential using either the Gardner grade ( $P < 0.01$ ,  $n = 209$ ), KIDScore ( $P < 0.05$ ,  $n = 207$ ) or EmbryoScore ( $P < 0.05$ ,  $n = 184$ ), compared to less viable blastocysts and in blastocysts that resulted in a clinical pregnancy compared to those that failed to implant ( $P < 0.05$ ,  $n = 37$ ). Additionally, duration of cavitation was inversely related to glucose consumption ( $P < 0.05$ ,  $n = 200$ ). Total amino acid consumption was significantly higher in blastocysts with an EmbryoScore higher than the cohort median score ( $P < 0.01$ ,  $n = 185$ ). Furthermore, the production of amino acids was significantly lower in blastocysts with a high Gardner grade ( $P < 0.05$ ,  $n = 209$ ), KIDScore ( $P < 0.05$ ,  $n = 207$ ) and EmbryoScore ( $P < 0.01$ ,  $n = 184$ ).

**LIMITATIONS, REASONS FOR CAUTION:** Samples were collected from patients who had ICSI treatment and from only one clinic.

**WIDER IMPLICATIONS OF THE FINDINGS:** These results confirm that metabolites, such as glucose and amino acids, are valid biomarkers of embryo viability and could therefore be used in conjunction with other systems to aid in the selection of a healthy embryo.

**STUDY FUNDING/COMPETING INTEREST(S):** Work was supported by Virtus Health. D.K.G is contracted with Virtus Health. The other authors have no conflict of interest to declare.

**TRIAL REGISTRATION NUMBER:** N/A.

**Key words:** embryo / glucose / amino acids / non-invasive / selection / viability

## Introduction

Historically, transferring multiple embryos in an IVF cycle was performed to attain acceptable success rates. However, transferring two or more embryos creates the possibility of a multiple gestation, which carries significantly greater medical risks to both mother and child (Albrecht and Tomich, 1996; Luke *et al.*, 1996; Adashi *et al.*, 2003; Ombelet *et al.*, 2005). Improvements in embryo culture systems facilitated single embryo transfers, reducing the incidence of multiple gestations (Gerris *et al.*, 1999) and in the last 20 years, there has been a shift to single blastocyst transfers (Gardner *et al.*, 1998; 2000; Harbottle *et al.*, 2015; Takeshima *et al.*, 2016; Penzias *et al.*, 2017). While pregnancy rates worldwide have increased largely due to improvements in culture conditions, our ability to decrease time to pregnancy is dependent upon our capabilities to select the most viable blastocyst for transfer.

Traditionally, embryos are graded on morphological features leading to the creation of scoring systems for each successive stage of development. Parameters assessed include blastomere number, symmetry and degree of fragmentation during the cleavage stages (Cummins *et al.*, 1986; Gerris *et al.*, 1999; Van Royen *et al.*, 1999), as well as size of blastocoel, and inner cell mass (ICM) and trophectoderm (TE) differentiation in the case of the blastocyst (Gardner *et al.*, 2000). Traditional morphological grading requires removal of the embryo culture dish from the incubator for assessment under the microscope, thereby exposing embryos to fluctuations in the environment such as light, temperature and pH, which can adversely impact embryo physiology and developmental potential (Lane and Gardner, 2005; Hansen, 2007; Zander-Fox *et al.*, 2010; Wale and Gardner, 2016; Gardner and Kelley, 2017). Additionally, such an approach to grading is, by necessity, restricted to only a handful of discrete time points during development, thereby failing to capture the true dynamic nature of preimplantation embryo development (Montag *et al.*, 2011).

With the advent of time-lapse systems, preimplantation embryo development can be captured continuously, whilst also providing an uninterrupted culture environment. Time-lapse has subsequently facilitated identification of novel morphological events, such as reverse and direct cleavage, both of which have been linked to decreased embryo viability (Rubio *et al.*, 2012; Liu *et al.*, 2014). Annotating the timing of key morphological events and the rate of development (i.e. the time between two morphological events) has in turn led to the development of algorithms for embryo selection incorporating both morphological and morphokinetic parameters (Rubio *et al.*, 2014; Basile *et al.*, 2015; Milewski *et al.*, 2015; Liu *et al.*, 2016; Petersen *et al.*, 2016; Reignier *et al.*, 2019). Annotating morphokinetic parameters for each individual embryo is, however, time-consuming and a level of inter-observer and intra-observer subjectivity exists impacting overall grading success (Storr *et al.*, 2017).

Artificial intelligence (AI) is relatively new to the field of assisted reproductive technologies and represents a potential means of standardizing and automating embryo selection. AI can be trained to assess embryo viability without preset assumptions, thereby removing the subjectivity previously associated with embryo grading (Curchoe and Bormann, 2019). Such deep-learning has been applied to a single static image during the preimplantation period (Chen *et al.*, 2009; Miyagi *et al.*, 2019; Thirumalaraju *et al.*, 2019), while other groups have

utilized images from across the entire preimplantation period facilitated by time-lapse microscopy, thereby significantly increasing the amount of data used to identify embryos with the highest viability (Tran *et al.*, 2019). Such technologies hold great promise and the clinical introduction of AI awaits validation in prospective randomized controlled trials.

While assessment of morphology and morphokinetics is of value in deselection and selection of embryos for transfer, they are unable to provide a direct measure of embryo physiology (Patemot *et al.*, 2011; Santos Filho *et al.*, 2012; VerMilyea *et al.*, 2014). Metabolic regulation is essential for embryo development, and aberrations in preimplantation embryo metabolism are an indicator of lower postimplantation viability (Gardner, 1998; Gardner and Wale, 2013). Importantly, embryos that have been assigned the same morphological grade do not necessarily exhibit the same metabolic profile (Gardner *et al.*, 2001). Analysis of embryo metabolism can therefore provide additional information regarding embryo viability subsequently aiding embryo selection. To date, studies on human embryos have focused on the utilization of carbohydrates or amino acids (Gott *et al.*, 1990; Gardner *et al.*, 2001; Houghton *et al.*, 2002; Gardner *et al.*, 2011). However, other metabolites including lactate, lipids and oxygen (the consumption of which can provide an indirect measure of oxidative metabolism) which have been analyzed in animal models, may also be of value in establishing the metabolic state and health of the human embryo (Lane and Gardner, 1996; Thompson *et al.*, 1996; Sturmey *et al.*, 2009).

The metabolic profile of an embryo can be determined through the non-invasive analysis of changes in metabolite concentrations within spent culture medium (Leese and Barton, 1984; Houghton *et al.*, 2002). It has been demonstrated that high levels of glucose consumption are associated with higher development and implantation potential in human, mouse and cow blastocysts (Renard *et al.*, 1980; Gardner and Leese, 1987; Lane and Gardner, 1996; Gardner *et al.*, 2001; 2011; Lee *et al.*, 2015; Kelley and Gardner, 2019). Additionally, amino acid profiles are distinctly different between embryos of different developmental stages and quality (Houghton *et al.*, 2002; Brison *et al.*, 2004; Picton *et al.*, 2010; Wale and Gardner, 2012; Lee *et al.*, 2015; Kelley and Gardner, 2019). These data therefore support the possible use of both glucose and amino acids as biomarkers to evaluate embryo physiology and developmental potential prior to transfer.

Furthermore, metabolism is directly linked to gene expression and developmental programming through the metaboloepigenetic axis, in which metabolites and cofactors regulate the activity of epigenetic modifiers (Donohoe and Bultman, 2012; Gardner and Harvey, 2015; Harvey *et al.*, 2016). As distinct metabolic profiles of an embryo have been shown to manifest as changes in development post-transfer (Lane and Gardner, 1996; 1998; Mitchell *et al.*, 2009), the utilization and analysis of metabolic biomarkers would aid in the selection of embryos with normal preimplantation physiology and subsequently increase the likelihood of healthy offspring (Barker and Osmond, 1986; Barker *et al.*, 1989; Gardner and Kelley, 2017; Ferrick *et al.*, 2019). It is currently unknown if metabolism is linked to existing embryo viability markers. Consequently, the aim of this study was to determine how blastocyst glucose and amino acid metabolism, as a measure of embryonic viability and health, relates to embryonic developmental parameters and transfer outcomes.

## Materials and methods

### Patient selection and ovarian stimulation

Fifty patients aged  $\leq 37$  years, with no more than two previous IVF cycles, undergoing an ICSI cycle between January 2018 and July 2019 were included in this study. Women underwent a gonadotropin-releasing hormone (GnRH) antagonist stimulation protocol. Ovarian stimulation began on the second day of menstrual cycle with recombinant FSH injections (Gonal F, Merck Australia). A GnRH antagonist (Cetrotide, Merck Australia) was administered on Days 4–5 of stimulation to prevent premature ovulation. Transvaginal ultrasound and serum estradiol levels were used to monitor cycles. Upon leading follicles reaching  $\sim 17$  mm in size, a trigger hCG injection (Ovidrel, Merck Australia) was administered and oocyte collection performed 36 h post-trigger.

### Embryo culture

Two hours following oocyte retrieval oocytes were denuded of surrounding cumulus cells using a hyaluronidase solution (SynVibro Hyadase, CooperSurgical, CT, USA) and inseminated via ICSI 2 h later. Injected oocytes were immediately transferred to individual culture wells containing 25  $\mu$ l G-TL medium overlaid with 1.4 ml Ovoil (Vitrolife AB, Sweden) in a pre-equilibrated EmbryoSlide<sup>®</sup> culture dish (Vitrolife AB, Sweden). Embryos were cultured in an EmbryoScope<sup>®</sup> time-lapse incubator (Vitrolife AB, Sweden) at 5% O<sub>2</sub>, 6% CO<sub>2</sub>, 89% N<sub>2</sub> at 37°C and time of ICSI was set as insemination time. At 90 and 114 h postinsemination, embryos were washed in culture medium and transferred to a new pre-equilibrated EmbryoSlide<sup>®</sup> culture dish containing 15  $\mu$ l G-TL medium in each well overlaid with 1.4 ml Ovoil. On Day 5 of development, embryos were assessed for transfer or vitrification, or cultured until Day 6 where they were either vitrified or discarded accordingly. The 90–114 h culture dishes containing spent media were stored at  $-20^{\circ}\text{C}$  until collection for metabolic analysis. Two hundred and nine embryos that reached the blastocyst stage during culture (i.e. by Day 6) were retrospectively analyzed for morphological grade, morphokinetics, metabolism and transfer success.

### Analysis of morphology

Morphological assessment was conducted at 115 h postinsemination. Blastocyst expansion and ICM and TE quality were graded according to the Gardner grading system (Gardner et al., 2000). Embryos graded higher than BB were considered to be of higher viability than embryos graded BB or less (Gardner et al., 2004). Blastocyst diameter was measured (115 h postinsemination) using the EmbryoViewer<sup>®</sup> software diameter tool (version 7.5.201.20844, Vitrolife AB, Sweden) and calculated as the distance between the outer borders of the TE (Almagor et al., 2016).

### Analysis of morphokinetics

Morphokinetic analysis was achieved using EmbryoViewer<sup>®</sup> software to assess images captured by the EmbryoScope<sup>®</sup> time-lapse incubator every 10 min in seven focal planes. The specific timings of two-cell cleavage (t2), three-cell cleavage (t3), four-cell cleavage (t4), five-cell cleavage (t5), six-cell cleavage (t6), seven-cell cleavage (t7), eight-cell cleavage (t8), morulae (tM), start of blastulation (tSB), blastocyst

(tB), expanded blastocyst (tEB) and hatching blastocyst (tH) were recorded as hours postinsemination (Desai et al., 2014). Annotations were recorded for embryos which could be accurately assessed. KIDScore values (0–9.9) predict the probability that an embryo will successfully implant (Reignier et al., 2019) and are calculated utilizing the D5 KIDScore algorithm (version 2), which is integrated into the EmbryoViewer<sup>®</sup> software and available for use clinically. Embryos assigned a KIDScore greater than the median cohort score (6.9) were considered to be of higher viability than embryos assigned a lower KIDScore. Of the 209 embryos cultured, two embryos where annotations could not be accurately assessed were not included in analysis. Additionally, rate of expansion (tEB–tSB) was calculated and embryos were grouped into fast ( $\leq 13$  h) or slow ( $> 13$  h) expansion rates as previously described (Desai et al., 2018). To minimize inter-user variability, only one scientist conducted the annotation assessments.

### AI selection

Videos of preimplantation development were exported from EmbryoViewer<sup>®</sup> software (0–115 h postinsemination) and uploaded into IVY (version 1.0.0, Harrison AI, Sydney, AUS) an AI program, which assesses preimplantation embryo development across a single focal plane and calculates an EmbryoScore (%) which represents the probability that an embryo will develop a fetal heartbeat and can subsequently assist in ranking embryos for transfer (Tran et al., 2019). Embryos assigned an EmbryoScore greater than the median cohort score (29%) were considered to be of higher viability than embryos assigned a lower EmbryoScore. Of the 209 embryos cultured, 25 embryos could not be included in analysis as a result of an interruption in the time-lapse video, such as the embryo went out of focus or oil bubbles in the culture well. Such factors can impact the overall EmbryoScore.

### Metabolic analysis

Day 5 (90–114 h) spent media samples were collected and analyzed for both glucose and amino acid metabolism to provide a detailed metabolic profile for each individual embryo that reached the blastocyst stage. Spent media samples (test) and no-embryo (control) media were collected for each patient and metabolite consumption/production was calculated by subtracting test samples from controls.

#### Glucose uptake

Ultramicrofluorescence (UMF), a miniaturization of conventional enzymatic analysis, was utilized to quantitate glucose metabolism (Leese and Barton, 1984; Gardner et al., 2001).

#### Amino acid utilization

Liquid chromatography-mass spectrometry (LC-MS) analysis using an Agilent 6490 Triple Quadrupole LC-MS with iFunnel Technology coupled with an Agilent 1290 liquid chromatography system (Agilent, Santa Clara, CA, USA) was utilized to measure amino acid concentrations when compared against a standard calibrated curve (Wale and Gardner, 2012). Pooled quality controls and pooled batch quality controls were conducted to ensure uniformity within and between batches and Agilent MassHunter Quantitative Analysis software (B.08.0, Agilent, CA, USA) was

used to calculate relative abundances (integrated area) of amine-containing metabolites.

## Pregnancy assessment

Of the 209 embryos cultured, 37 single blastocysts were transferred in a fresh cycle and the remaining blastocysts were vitrified as part of a freeze-all cycle. The embryo with the best morphology, followed by the highest KIDScore amongst a cohort was selected for transfer. Only embryos transferred in a fresh cycle were included in pregnancy rate analysis. Biochemical pregnancy was recorded after an hCG blood test (positive pregnancy was an hCG level  $>5$  IU/L), and clinical pregnancies were later confirmed at a 6 week ultrasound and observation of a fetal heartbeat.

## Statistical analysis

For morphokinetic analysis blastocysts were grouped according to the median glucose and amino acid utilization. To analyse blastocyst metabolism in comparison to KIDScore and EmbryoScore, embryos were grouped based on the median scores (6.9 and 29%, respectively). Embryos were grouped as per Gardner grade (higher than BB or BB and less) for analysis of blastocyst metabolism and morphological grade. Data are expressed as mean  $\pm$  SEM and tested for normality using the Shapiro–Wilk test. The difference between two groups was determined using parametric Student's *t*-test or nonparametric Mann–Whitney *U* test and the *P*-value threshold was set to 0.05. All analyses were conducted using Prism 8 (version 8.3.0, GraphPad, LLC).

## Ethical approval

Ethical approval was obtained from Melbourne IVF Human Research Ethics Committee (53/117-MIVF), patients were recruited during clinical consultation.

## Results

### Blastocyst metabolism is positively related to embryo viability scores

Three different grading systems were used to retrospectively assess embryo viability prior to transfer: (i) morphological grading using the Gardner grading system, (ii) D5 KIDScore algorithm and (iii) EmbryoScores through an AI system (IVY). Regardless of which method embryo viability was measured, blastocysts with the highest viability consumed at least 40% more glucose than lower-quality blastocysts (Fig. 1). Blastocysts with a Gardner grade greater than a BB grade ( $n = 86$ ) consumed significantly more glucose on Day 5 of development than less viable blastocysts which scored a BB grade or less ( $n = 123$ ) ( $91.7 \pm 8.5$  versus  $61.4 \pm 5.9$  pmol/embryo/h,  $P < 0.01$ ) (Fig. 1A). Similarly, blastocysts that were assigned a KIDScore greater than the median cohort score ( $n = 100$ ) consumed more glucose on Day 5 than lower scoring blastocysts ( $n = 107$ ) ( $88.1 \pm 7.8$  versus  $60.9 \pm 6.3$  pmol/embryo/h,  $P < 0.05$ ) (Fig. 1B) and blastocysts with an EmbryoScore greater than the median cohort score ( $n = 91$ ) (i.e. those with a higher probability of developing a fetal heartbeat) consumed more glucose on Day 5 of development compared to less

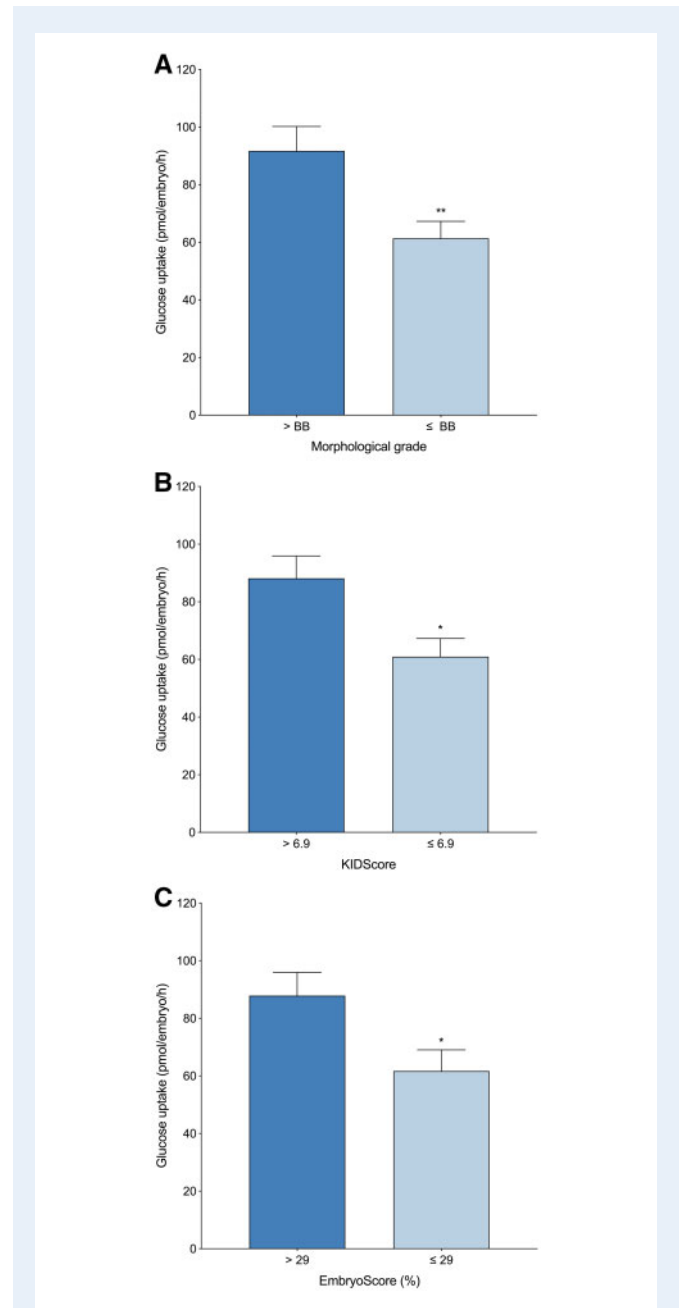

**Figure 1. Blastocyst glucose uptake compared to embryo viability.** (A) Gardner grade ( $>BB$ ,  $n = 86$ ;  $\leq BB$ ,  $n = 123$ ), (B) KIDScore ( $>6.9$ ,  $n = 100$ ;  $\leq 6.9$ ,  $n = 107$ ) and (C) EmbryoScore ( $>29\%$ ,  $n = 91$ ;  $\leq 29\%$ ,  $n = 93$ ). Each data set (A–C) is expressed as mean  $\pm$  SEM (pmol/embryo/h). Significance is measured utilizing Mann–Whitney *U* test and denoted by asterisks, \* $P < 0.05$ , \*\* $P < 0.01$ .

viable blastocysts ( $n = 93$ ) ( $87.9 \pm 8.1$  versus  $61.7 \pm 7.4$  pmol/embryo/h,  $P < 0.05$ ) (Fig. 1C). Of those embryos with a high KIDScore and an EmbryoScore ( $n = 83$ ), 77% had a high EmbryoScore ( $n = 64$ ). Of these embryos with both a high KIDScore and EmbryoScore, 64% consumed more glucose than the median cohort uptake ( $n = 41$ ).

## Blastocyst glucose metabolism is related to clinical pregnancy rates

Blastocysts that resulted in a clinical pregnancy demonstrated a 2-fold increase in glucose consumption on Day 5 of the preimplantation period than blastocysts that failed to implant or maintain a successful pregnancy ( $77.4 \pm 11.7$  versus  $38.4 \pm 11.2$  pmol/embryo/h,  $P < 0.05$ ) (Fig. 2). Of note, blastocysts assigned an AA morphological grade which established a clinical pregnancy consumed the highest level of glucose ( $84.4 \pm 17.3$  pmol/embryo/h,  $n = 11$ ). Additionally, while results were not statistically significant, blastocysts assigned an AA morphological grade which failed to establish a pregnancy ( $n = 7$ ) consumed lower glucose than blastocysts assigned a B grade for ICM and/or TE (AB, BA or BB) that successfully implanted ( $n = 6$ ) ( $22.2 \pm 25.3$  pmol/embryo/h versus  $64.5 \pm 9.1$  pmol/embryo/h) ( $P = 0.12$ ). No significant difference was observed in amino acid utilization profiles between embryos that established a clinical pregnancy and embryos that failed to implant (data not shown).

## Amino acid profiles of blastocysts are distinctly different according to embryo viability scores

Blastocysts with high viability according to their Gardner grade consumed significantly higher levels of arginine ( $P < 0.05$ ), aspartate ( $P < 0.05$ ), glutamate ( $P < 0.05$ ), isoleucine ( $P < 0.05$ ), leucine ( $P < 0.05$ ), lysine ( $P < 0.05$ ) and threonine ( $P < 0.05$ ) and produced significantly lower levels of alanine ( $P < 0.01$ ) and glutamine ( $P < 0.0001$ ), compared to blastocysts assigned a lower Gardner grade

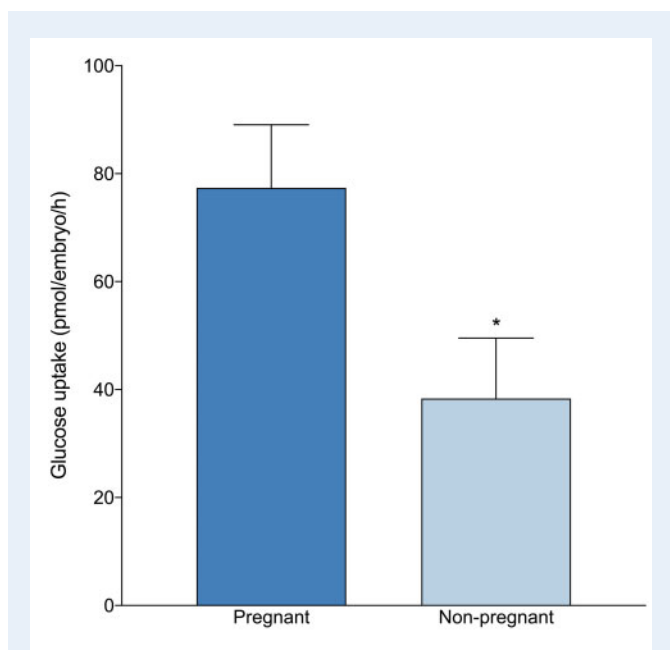

**Figure 2. Glucose uptake of blastocysts that were transferred in a fresh single blastocyst transfer cycle and ongoing pregnancy rates.** All data are expressed as mean  $\pm$  SEM (pmol/embryo/h) for pregnant ( $n = 17$ ) and non-pregnant ( $n = 20$ ). Significance is measured utilizing Student's *t*-test and asterisks denote significance,  $*P < 0.05$ .

(Fig. 3A). Similarly, these same amino acids as well as asparagine, phenylalanine, taurine and tryptophan were utilized differently by blastocysts that had a high implantation potential, as assessed by D5 KIDScore algorithm, compared to less viable blastocysts (alanine,  $P < 0.01$ ; arginine,  $P < 0.05$ ; asparagine,  $P < 0.05$ ; aspartate,  $P < 0.05$ ; glutamine,  $P < 0.01$ ; glutamate,  $P < 0.05$ ; isoleucine,  $P < 0.05$ ; leucine,  $P < 0.05$ ; lysine,  $P < 0.05$ ; phenylalanine,  $P < 0.05$ ; taurine,  $P < 0.05$ ; threonine,  $P < 0.05$ ; tryptophan,  $P < 0.05$ ) (Fig. 3B). Furthermore, each amino acid with the exception of alanyl-glutamine, glycine and valine were either consumed at higher levels or produced at lower levels by blastocysts with a higher EmbryoScore than less viable blastocysts (alanine,  $P < 0.001$ ; arginine,  $P < 0.01$ ; asparagine,  $P < 0.01$ ; aspartate,  $P < 0.01$ ; glutamine,  $P < 0.001$ ; glutamate,  $P < 0.001$ ; histidine,  $P < 0.05$ ; isoleucine,  $P < 0.05$ ; leucine,  $P < 0.01$ ; lysine,  $P < 0.01$ ; methionine,  $P < 0.05$ ; phenylalanine,  $P < 0.05$ ; proline,  $P < 0.05$ ; serine,  $P < 0.01$ ; taurine,  $P < 0.01$ ; threonine,  $P < 0.01$ ; tryptophan,  $P < 0.01$ ; tyrosine,  $P < 0.05$ ) (Fig. 3C).

## Blastocyst total amino acid consumption and production are related to embryo viability scores

Overall amino acid turnover (sum of consumption and production) was analyzed as a further measure of blastocyst metabolic activity. There was no significant difference in amino acid turnover between blastocysts of high and low viability when assessed using Gardner grade, KIDScore or EmbryoScore (Fig. 4). However, the total production of amino acids on Day 5 of preimplantation development was significantly lower in blastocysts with high viability, as determined by Gardner grade ( $171.6 \pm 30.5$  versus  $210.2 \pm 24.1$  pmol/embryo/h,  $P < 0.05$ ), D5 KIDScore algorithm ( $166.1 \pm 27.0$  versus  $221.1 \pm 26.6$  pmol/embryo/h,  $P < 0.05$ ) and EmbryoScore ( $160.5 \pm 26.4$  versus  $235.9 \pm 30.4$  pmol/embryo/h,  $P < 0.01$ ) (Fig. 4). Additionally, blastocysts with high EmbryoScores also consume significantly more amino acids overall compared to less viable blastocysts ( $245.2 \pm 28.6$  versus  $134.7 \pm 20.6$  pmol/embryo/h,  $P < 0.01$ ) (Fig. 4C).

## Fast developing embryos have different Day 5 metabolic profiles compared to slow developing embryos

Embryos that consumed more than the median amount of glucose (61 pmol/embryo/h) on Day 5 of development developed faster across all morphokinetic parameters (with the exception of t3, t5, t8 and tH) compared to embryos that consumed lower levels of glucose on Day 5 of development (Fig. 5A). A delay of  $\sim 1$  h during the early cleavage stages was observed in embryos that consumed lower levels of glucose on Day 5, and this delay was extended to 2–4 h by the blastocyst stage (Fig. 5A). Furthermore, embryos with an expansion rate (tEB-tSB) of 13 h or less consumed significantly higher levels of glucose on Day 5 of development compared to embryos that took longer than 13 h to fully expand ( $85.0 \pm 6.9$  versus  $61.6 \pm 9.2$  pmol/embryo/h,  $P < 0.05$ ) (Fig. 5B). Blastocysts with a diameter greater than the mean of 151  $\mu\text{m}$  ( $n = 96$ ) consumed significantly more glucose than smaller blastocysts ( $n = 104$ ) ( $94.7 \pm 8.1$  versus  $56.2 \pm 6.6$  pmol/embryo/h,  $P < 0.001$ ), with a significant linear relationship between blastocyst size and glucose uptake ( $P < 0.001$ ).

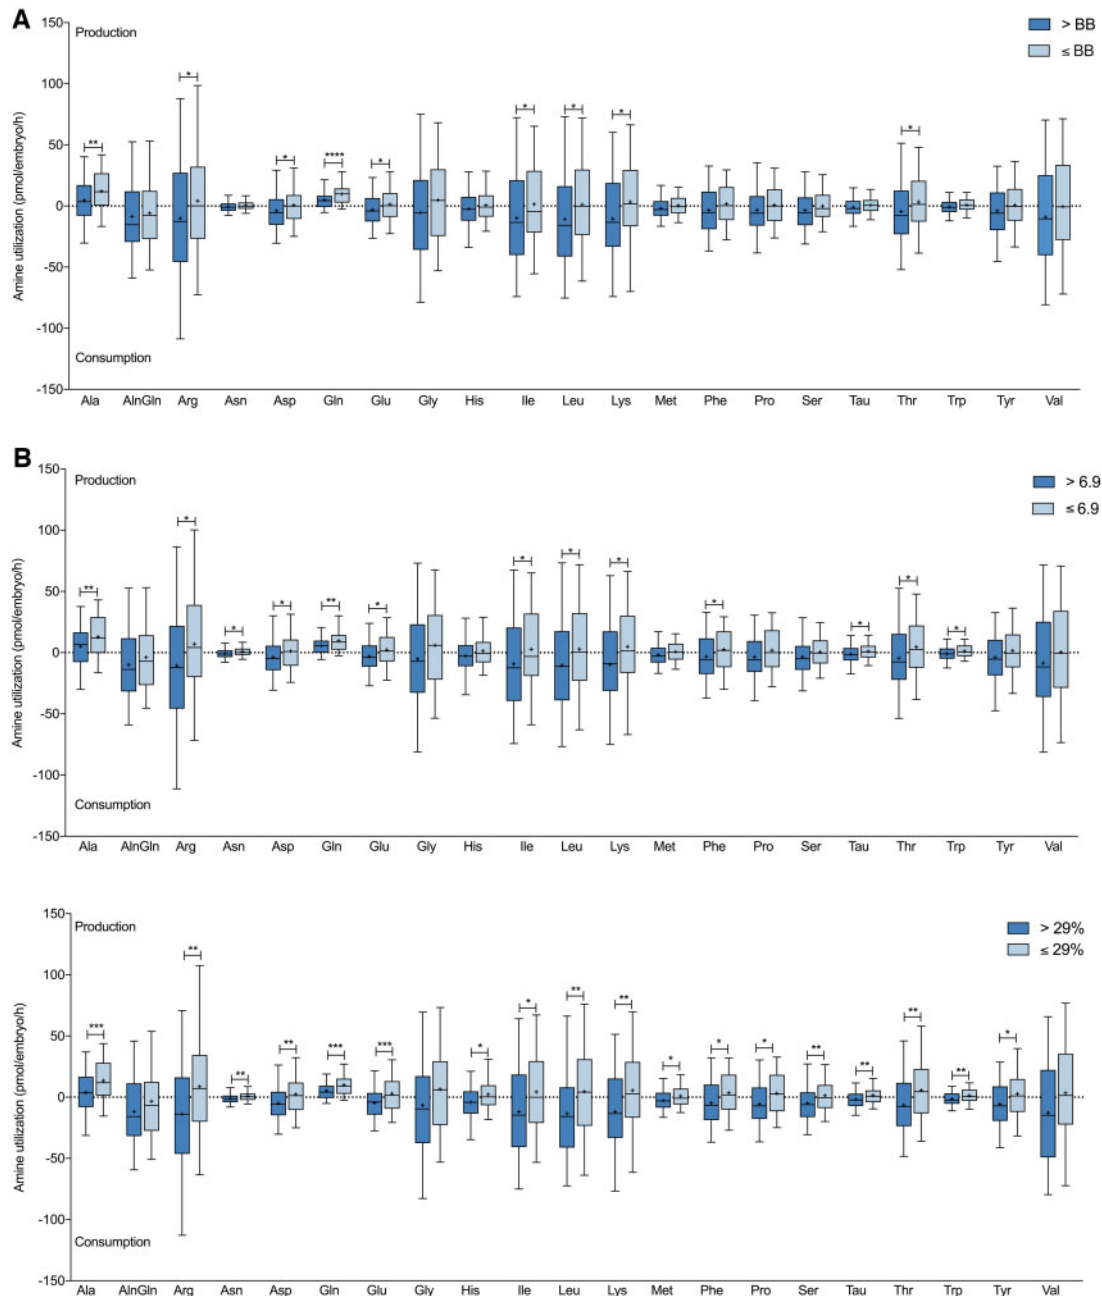

**Figure 3. Blastocyst amino acid utilization profiles compared to embryo viability. (A)** Gardner grade (>BB,  $n = 86$ ;  $\leq$ BB,  $n = 123$ ), **(B)** KIDScore (>6.9,  $n = 100$ ;  $\leq$ 6.9,  $n = 107$ ) and **(C)** EmbryoScore (>29%,  $n = 91$ ;  $\leq$ 29%,  $n = 93$ ). Negative values represent amino acid consumption and positive values represent amino acid production. Alanine (Ala), alanyl-glutamine (AlnGln), arginine (Arg), asparagine (Asn), aspartate (Asp), glutamine (Gln), glutamate (Glu), glycine (Gly), histidine (His), isoleucine (Ile), leucine (Leu), lysine (Lys), methionine (Met), phenylalanine (Phe), proline (Pro), serine (Ser), taurine (Tau), threonine (Thr), tryptophan (Trp), tyrosine (Tyr) and valine (Val). Boxes represent 25th to 75th percentile, whiskers represent 5th to 95th percentile, '+' represents mean, and median represented by horizontal line. Significance is measured utilizing Student's *t*-test and denoted by asterisks, \* $P < 0.05$ , \*\* $P < 0.01$ , \*\*\* $P < 0.001$ , \*\*\*\* $P < 0.0001$ .

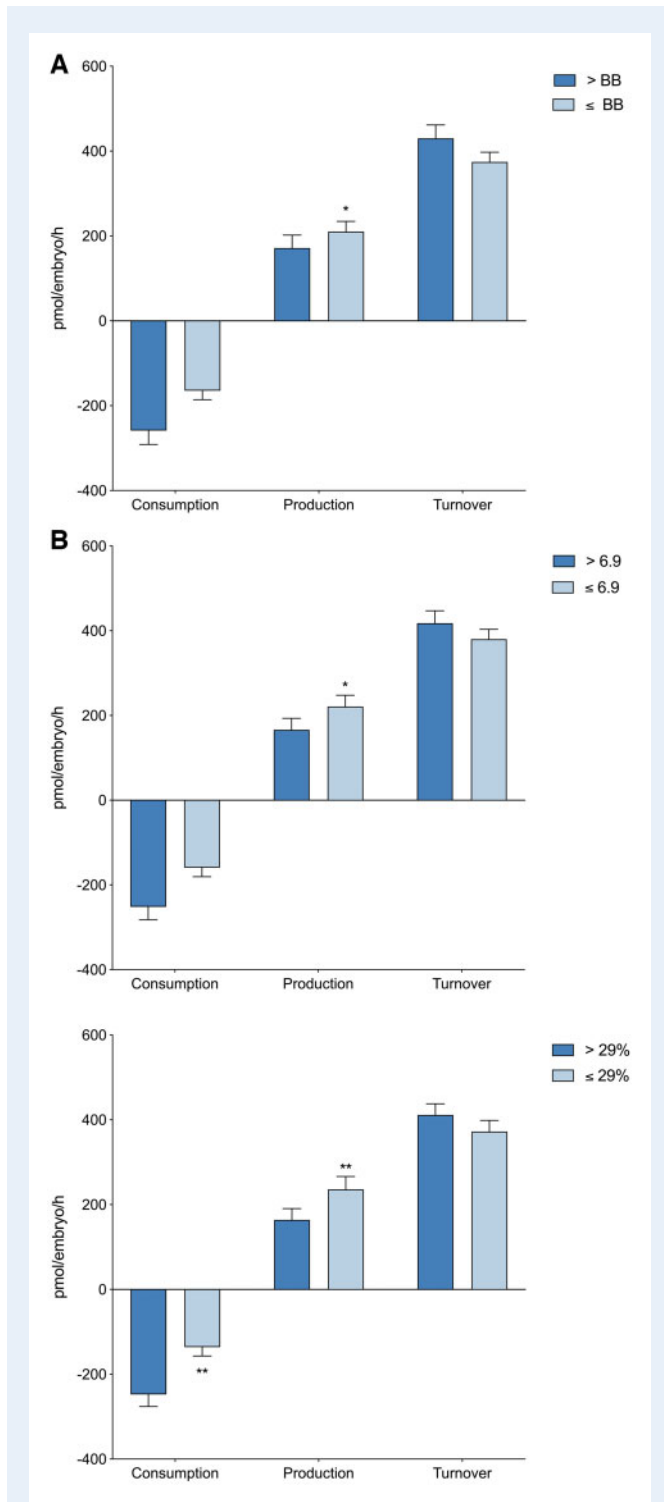

**Figure 4. Total amino acid consumption, production and amino acid turnover in relation to embryo viability.** (A) Gardner grade (>BB, n = 86; ≤BB, n = 123), (B) KIDScore (>6.9, n = 100; ≤6.9, n = 107) and (C) EmbryoScore (>29%, n = 91; ≤29%, n = 93). Each data set (A–C) is expressed as mean ± SEM (pmol/embryo/h). Significance is measured utilizing Mann–Whitney U test and denoted by asterisk, \* $P < 0.05$ , \*\* $P < 0.01$ .

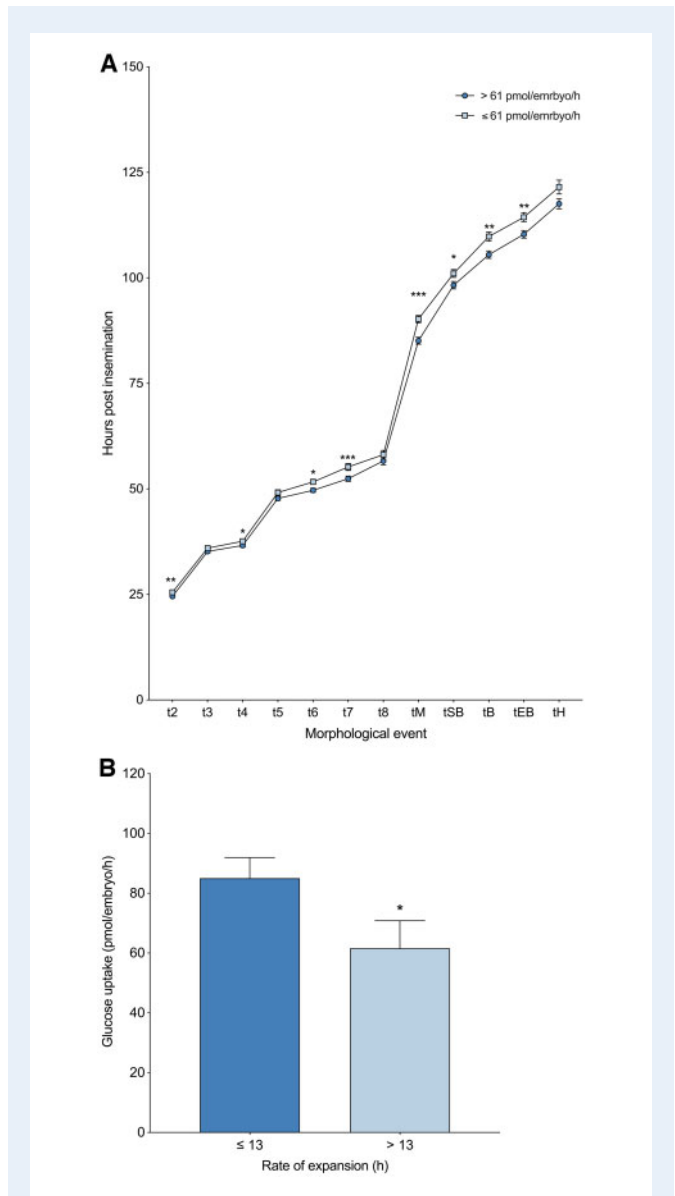

**Figure 5. Blastocyst glucose uptake and the relationship to morphokinetic development of preimplantation embryos.** (A) Morphokinetic development of embryos that consumed high or low levels of glucose. Dark, circular data points represent the timing of each key morphokinetic event of embryos that consumed greater than the median amount of glucose (61 pmol/embryo/h). Light, square data points represent the timing of each key morphokinetic event of embryos that consumed less than the median amount of glucose. Morphokinetic parameters calculated as hours post-insemination: two-cell cleavage, t2 (n = 209); three-cell cleavage, t3 (n = 209); four-cell cleavage, t4 (n = 209); five-cell cleavage t5 (n = 209); six-cell cleavage, t6 (n = 205); seven-cell cleavage, t7 (n = 200); eight-cell cleavage, t8 (n = 200); morulae, tM (n = 204); start of blastulation, tSB (n = 209); blastocyst, tB (n = 209); expanded blastocyst, tEB (n = 201); and hatching blastocyst, tH (n = 137). (B) Glucose uptake of embryos that fully expanded (tEB–tSB) in ≤13 h (n = 116) compared to embryos that fully expanded in >13 h (n = 84). Data are expressed as mean ± SEM, significance is measured utilizing Mann–Whitney U test and asterisks denote significance, \* $P < 0.05$ , \*\* $P < 0.01$ , \*\*\* $P < 0.001$ .

Consistent with glucose consumption, the amino acid profiles of faster developing embryos were significantly different. Specifically, embryos that consumed higher levels of arginine, asparagine, aspartate, isoleucine, lysine, taurine and/or valine developed faster to tM, tSB, tB and/or tEB ( $P < 0.05$ ) (Table I). Additionally, alanine and glutamate were produced at lower levels by embryos that developed faster to tM, tSB, tB and/or tEB ( $P < 0.05$ ) (Table II). No significant difference was observed between Day 5 amino acid profiles and the time between tSB and tEB (i.e. rate of expansion).

## Discussion

In this study, blastocyst metabolism was shown to positively correlate with existing methods of embryo selection, Gardner grade, D5

KIDScore algorithm as well as the AI EmbryoScore. Of paramount significance, glucose consumption was found to be over 40% higher in blastocysts with a higher developmental and implantation potential. Indeed, when related to clinical pregnancy, glucose consumption was doubled in blastocysts that led to a successful pregnancy. Furthermore, blastocysts with a higher developmental potential and probability to succeed post-transfer also exhibited distinct amino acid profiles than blastocysts of lower viability, irrespective of which grading system was used.

Glucose is the predominant energy source utilized during blastocyst formation, supporting formation of the blastocoel, development of the first epithelium, and exponential cellular growth; processes which are energetically demanding (Biggers *et al.*, 1988; Watson *et al.*, 1990, 1992). High glucose consumption ensures carbon flux through the pentose phosphate pathway required to produce biosynthetic

**Table I Morphokinetic development of embryos and their correlation to blastocyst consumption of individual amino acids.**

| Consumption of amino acids (pmol/embryo/h) |          | Timing of specific morphokinetic events (h) |             |              |              |
|--------------------------------------------|----------|---------------------------------------------|-------------|--------------|--------------|
|                                            |          | tM                                          | tSB         | tB           | tEB          |
| Arginine                                   | > Median | 86.1 ± 1.1                                  | 98.3 ± 0.7* | 106.4 ± 0.9  | 111.1 ± 0.9  |
|                                            | ≤ Median | 88.3 ± 1.1                                  | 101.0 ± 1.1 | 108.9 ± 1.1  | 113.7 ± 1.1  |
| Asparagine                                 | > Median | 86.6 ± 0.7                                  | 98.5 ± 0.7  | 106.3 ± 0.9* | 111.0 ± 0.8* |
|                                            | ≤ Median | 88.7 ± 1.0                                  | 100.9 ± 1.0 | 109.0 ± 1.1  | 113.9 ± 1.1  |
| Aspartate                                  | > Median | 86.4 ± 0.7*                                 | 98.3 ± 0.7* | 106.4 ± 0.8  | 111.0 ± 0.8  |
|                                            | ≤ Median | 89.0 ± 1.0                                  | 101.1 ± 1.1 | 108.9 ± 1.1  | 113.8 ± 1.1  |
| Isoleucine                                 | > Median | 85.8 ± 1.1                                  | 98.5 ± 0.7  | 106.2 ± 0.8* | 110.9 ± 0.8* |
|                                            | ≤ Median | 88.6 ± 1.0                                  | 100.9 ± 1.0 | 109.1 ± 1.1  | 114.0 ± 1.1  |
| Lysine                                     | > Median | 86.0 ± 1.1                                  | 98.5 ± 0.7  | 106.3 ± 0.8* | 111.0 ± 0.8* |
|                                            | ≤ Median | 88.5 ± 1.0                                  | 100.8 ± 1.1 | 109.9 ± 1.2  | 113.9 ± 1.2  |
| Taurine                                    | > Median | 86.9 ± 0.7                                  | 98.5 ± 0.8  | 106.0 ± 0.8* | 111.2 ± 0.9  |
|                                            | ≤ Median | 88.4 ± 1.0                                  | 100.9 ± 1.0 | 109.3 ± 1.1  | 113.7 ± 1.1  |
| Valine                                     | > Median | 87.0 ± 0.8                                  | 98.0 ± 0.7  | 106.1 ± 0.8* | 110.8 ± 0.9  |
|                                            | ≤ Median | 88.3 ± 1.0                                  | 101.4 ± 1.0 | 109.2 ± 1.1  | 114.0 ± 1.1  |

Median consumption (pmol/embryo/h): arginine 5.10; asparagine 0.37; aspartate 1.40; isoleucine 6.10; lysine 0.15; taurine 0.20; valine 5.40. The timing of specific morphological events (time to morulae (tM), n = 204; start of blastulation (tSB), n = 209; blastocyst (tB), n = 209; and expanded blastocyst (tEB), n = 201; expressed as mean ± SEM (hours postinsemination)). Significance is measured utilizing Student's t-test and asterisks denote level of significance.

\* $P < 0.05$ .

**Table II Morphokinetic development of embryos and their correlation to blastocyst production of individual amino acids.**

| Production of amino acids (pmol/embryo/h) |          | Timing of specific morphokinetic events (h) |               |               |              |
|-------------------------------------------|----------|---------------------------------------------|---------------|---------------|--------------|
|                                           |          | tM                                          | tSB           | tB            | tEB          |
| Alanine                                   | > Median | 88.3 ± 1.0                                  | 101.4 ± 1.0   | 109.2 ± 1.1   | 114.0 ± 1.1  |
|                                           | ≤ Median | 87.0 ± 0.8                                  | 98.0 ± 0.7**  | 106.1 ± 0.8*  | 110.8 ± 0.9* |
| Glutamate                                 | > Median | 89.1 ± 1.0                                  | 101.5 ± 1.1   | 109.8 ± 1.1   | 114.2 ± 1.1  |
|                                           | ≤ Median | 86.2 ± 0.7*                                 | 97.9 ± 0.7*** | 105.5 ± 0.8** | 110.7 ± 0.8* |

Median production (pmol/embryo/h): alanine 8.95; glutamate 6.70. The timing of specific morphological events (time to morulae (tM), n = 204; start of blastulation (tSB), n = 209; blastocyst (tB), n = 209; and expanded blastocyst (tEB), n = 201; expressed as mean ± SEM (hours postinsemination)). Significance is measured utilizing Student's t-test and asterisks denote level of significance.

\* $P < 0.05$ , \*\* $P < 0.01$  and \*\*\* $P < 0.001$ .



precursors for DNA, RNA and lipid synthesis (Reitzer et al., 1980; Morgan and Faik, 1981; Gardner, 1998). Furthermore, the blastocyst has the capacity to convert glucose to lactate, even in the presence of sufficient oxygen, through aerobic glycolysis (Gardner, 1998). Lactate, long perceived as a by-product or regulator of metabolism (Lane and Gardner, 1996, 2000), has more recently been implicated as a key signaling molecule and immunomodulator, thereby regulating initial events of implantation (Gardner, 2015). Additionally, lactate may directly affect embryonic epigenetic state and gene expression through lactylation of histone proteins (Zhang et al., 2019), an example of a metaboloepigenetic interaction, further highlighting the significance of blastocyst glucose metabolism in assessing embryonic physiology and health. Consistent with previous reports that embryos consuming higher levels of glucose are associated with a higher developmental potential (Renard et al., 1980; Gardner and Leese, 1987; Gardner et al., 2001; 2011; Lee et al., 2015), we show that blastocysts with higher viability consume more glucose during Day 5 of development than less viable blastocysts. Furthermore, embryos that experienced a delay of 2–4 h in development to the blastocyst stage consumed lower levels of glucose on Day 5 of the preimplantation period. This is consistent with data on the mouse embryo which determined that slow cleaving embryos give rise to blastocysts with reduced glucose consumption (Lee et al., 2015). Together, these results support the hypothesis that slower developing embryos, or embryos of lower viability, have a diminished ability to maintain the energy and biosynthetic requirements to support viable blastocyst formation, and subsequently viability post-transfer (Edwards et al., 1984; Wong et al., 2010; Meseguer et al., 2011; Lee et al., 2015).

Blastocyst size has been linked to metabolic activity and viability due to the high energy demands of blastocyst expansion (Gardner and Balaban, 2016; Niederberger et al., 2019). Blastocyst diameter, as an accurate measure of blastocyst size, is positively correlated to clinical pregnancy rates where larger embryos are more likely to establish a clinical pregnancy (Shapiro et al., 2008). Similarly, this study found a positive relationship between blastocyst diameter and glucose consumption. Consistently, blastocysts with a faster expansion rate (tEB-tSB) consumed more glucose than slower expanding blastocysts, plausibly due to these embryos having a higher capacity to maintain energy requirements, subsequently supporting high developmental potential. However, it has been established that even when blastocysts do have the same diameter (Lane and Gardner, 1996; Gardner et al., 2001), there is still a large metabolic variation between embryos, inferring that although the size of a blastocyst is related to metabolism, it is not the sole factor dictating the overall metabolic activity of the embryo.

Of further interest, Desai et al. (2018) found embryos that have a faster expansion rate were associated with a lower rate of aneuploidy. Changes to karyotypes associated with aneuploidy leads to alterations in gene expression, the proteome and metabolism a phenomenon termed aneuploid-stress (Zhu et al., 2018), suggesting embryonic metabolism may be directly related to the genetic composition of embryos in addition to embryo viability and health. Ongoing investigations are currently underway to determine whether metabolic biomarkers can provide a non-invasive measure of embryonic genetic composition.

Retrospective analysis of clinical pregnancy rates confirms that glucose consumption is significantly higher in blastocysts that successfully implant and result in a clinical pregnancy compared to blastocysts that fail to development post-transfer. These data are consistent with

Gardner et al. (2011) who determined that glucose consumption of human blastocysts cultured at 5% oxygen was higher in blastocysts with positive transfer outcomes. It was further noted that while data were not significantly different, plausibly due to low sample numbers, blastocysts with a top Gardner grade (AA) that failed to lead to a successful pregnancy had a lower glucose uptake than lower graded blastocysts which were successful post-transfer. This supports the findings of Gardner et al. (2011) who concluded glucose metabolism was a stronger predictor of pregnancy success than morphological grade.

Higher developmental potential and probability of forming a viable pregnancy was also related to amino acid profiles, which may provide an additional means of measuring embryo physiology and health. Specifically, alanine, arginine, aspartate, isoleucine, leucine, lysine, glutamate, glutamine and threonine were utilized differently by blastocysts with high viability, regardless of the embryo selection method used. Of significance, arginine and leucine are both implicated in regulating the mammalian target of rapamycin (mTOR) pathway (González et al., 2012). mTOR is responsible for maintaining cellular homeostasis by responding to nutrient, energy and/or oxygen availability and regulates translation machinery and metabolic processes accordingly. A significant increase in arginine and leucine consumption by blastocysts with higher viability suggests less viable blastocysts are unable to maintain cellular homeostasis as effectively thereby impacting embryo developmental potential. Additionally, arginine and leucine, together and individually, also promote TE motility, which assists TE invasion and is a requirement for penetration of the endometrium during implantation (Martin et al., 2003; Gangloff et al., 2004; Guertin et al., 2006; González et al., 2012). Of further significance, blastocysts that consumed high levels of glucose also consumed significantly more aspartate than less viable embryos. Aspartate is the rate-limiting factor in the malate-aspartate shuttle that facilitates the regeneration of cytosolic nicotinamide adenine dinucleotide (NAD<sup>+</sup>) required for glucose metabolism (Gardner, 1998; Lane and Gardner, 2005; Mitchell et al., 2009). More recently NAD<sup>+</sup> has been recognized as a metaboloepigenetic signaling molecule via activation of sirtuins, a class of NAD<sup>+</sup>-dependent histone deacetylases (Haigis and Sinclair, 2010; Tatone et al., 2018). Hence, the relative availability of aspartate and subsequently NAD<sup>+</sup> may also influence embryonic gene regulation and subsequent health (Houtkooper et al., 2010; Donohoe and Bultman, 2012; Gardner and Harvey, 2015; Harvey et al., 2016; Ferrick et al., 2019; Lees et al., 2020). Given the wide array of metabolic and regulatory pathways amino acids are involved in, it is evident that between blastocysts of high and low viability, individual amino acid profiles represent distinct physiologies and provide a means of assessing important regulators of cellular homeostasis, cell-signaling, implantation and embryonic health. Of note, the amino acid analysis performed in this study assessed amino acid profiles over a 24 h period during blastocyst formation and is therefore limited in its ability to identify differences in flux and interactions between amino acid pathways. Targeted amino acid assays, designed to quantitate the utilization of an individual amino acid with high accuracy will plausibly provide further insight into amino acid utilization, and further studies are required for the development and validation of such assays.

The results of this study demonstrate that a blastocyst with a high probability of developing into viable and healthy pregnancy is one that consumes high levels of glucose and specific amino acids. Furthermore, this study shows no significant difference in total amino acid turnover,

despite the distinct patterns of amino acid consumption and production between blastocysts with different levels of viability. Consequently, these data do not align with the Quiet Hypothesis, which states that the most viable preimplantation embryo has the lowest overall metabolism and the lowest amino acid turnover (Leese, 2002). Of note, studies that lay the foundation for this hypothesis utilized 20% oxygen for culture or metabolic analysis (Bowman and McLaren, 1970; Leese, 1991; Turner *et al.*, 1994; Houghton *et al.*, 2002). Given that 20% oxygen directly perturbs both carbohydrate and amino acid metabolism leading to an altered physiology of the preimplantation embryo, it is plausible that the differences observed in this study and those which formed the basis of the Quiet Hypothesis are due to the concentration of oxygen utilized (Umaoka *et al.*, 1992; Guérin *et al.*, 2001; Wale and Gardner, 2012; Gardner, 2016; Kelley and Gardner, 2016; Gardner and Kelley, 2017; Kelley and Gardner, 2017, 2019). It was proposed by Gardner and Wale (2013) that viable embryos metabolize an optimal range of metabolites, i.e. one that is not suppressed nor unduly elevated (Gardner and Wale, 2013). This concept has gained traction and has been coined the 'Goldilocks Principle' (Leese *et al.*, 2016). Our data have shown that within this optimal range the most viable blastocyst is a blastocyst that is characterized by an 'active' metabolism and utilizes metabolites in a distinct manner. This metabolic profile represents the embryos ability to maintain sufficient energy to support both cellular homeostasis and biosynthesis required to support embryo development, viability and health of the resulting offspring.

Due to the retrospective nature of this study and low numbers of transferred embryos it was not feasible to establish the cumulative predictive power of metabolism combined with either morphological grades, KIDScore or EmbryoScore. However, as it was shown by Gardner *et al.* (2011) that metabolism is a stronger predictor of transfer success than morphological grades, it is tempting to speculate that the assessment of blastocyst metabolism (and indirectly the metabolome) will be complimentary to any system used to assess developmental potential based on morphological parameters such as the KIDScore and EmbryoScore. For example, of the 64 blastocysts with both a high KIDScore and EmbryoScore, inferring high viability, over a third had reduced glucose uptake indicating an impaired physiology which may therefore prevent such top-scoring embryos from resulting in a successful pregnancy. We therefore propose that a combination of metabolic activity together with morphological analysis will culminate in a single algorithm that provides greater power in predicting success post-transfer as well as subsequent fetal health.

This study is the first of its kind to incorporate analysis of both glucose and amino acid metabolism of individual preimplantation embryos under physiological (5%) oxygen concentrations. Of significance, while UMF is a highly sensitive technology and LC-MS is a great discovery tool as it allows analysis of all amino acids in a single sample, neither are translatable to a clinical setting. Bench top assay technologies, however, have previously been used to measure mouse embryo carbohydrate metabolism (Guerif *et al.*, 2013; Kelley and Gardner, 2019) and amino acids (Lee and Gardner, unpublished) and hence provide a means of assessing metabolic biomarkers clinically within an hour, making assessment of metabolic activity prior to a fresh transfer feasible. Consequently, we are now evaluating the predictive power of metabolic biomarkers to create an 'embryo health' selection algorithm

incorporating morphology, morphokinetics (optimized through AI) and metabolism in order to reduce the time to pregnancy and facilitate the birth of healthy children.

## Acknowledgements

The authors would like to thank the embryologists and physicians at Melbourne IVF for their support, and Metabolomics Australia for their expert assistance in amine analysis. The authors would also like to thank Dr. Alex Harvey, Dr. Rebecca Kelley, Mai Truong, Kathryn Gurner and Emma Whatley for their valuable comments on the manuscript.

## Authors' roles

D.K.G prepared the study design and contributed to the manuscript. Y.S.L.L assisted in the study design, coordination of sample collections and the preparation of the manuscript. L.F assisted in the study design, performed all viability assessments, carbohydrate analyses and statistical analysis and contributed to the manuscript.

## Funding

This work was supported by Virtus Health. L.F. was the recipient of Australian Government Research Training Program Scholarship, University of Melbourne.

## Conflict of interest

Virtus Health and Harrison AI have patented the AI technology used. D.K.G is contracted with Virtus Health. The other authors have no conflict of interest.

## References

- Adashi EY, Barri PN, Berkowitz R, Braude P, Bryan E, Carr J, Cohen J, Collins J, Devroey P, Frydman R *et al.* Infertility therapy-associated multiple pregnancies (births): an ongoing epidemic. *Reprod Biomed Online* 2003;**7**:515–542.
- Albrecht JL, Tomich PG. The maternal and neonatal outcome of triplet gestations. *Am J Obstet Gynecol* 1996;**174**:1551–1556.
- Almagor M, Harir Y, Fieldust S, Or Y, Shoham Z. Ratio between inner cell mass diameter and blastocyst diameter is correlated with successful pregnancy outcomes of single blastocyst transfers. *Fertil Steril* 2016;**106**:1386–1391.
- Barker DJ, Osmond C. Infant mortality, childhood nutrition, and ischaemic heart disease in England and Wales. *Lancet* 1986;**1**:1077–1081.
- Barker DJ, Osmond C, Golding J, Kuh D, Wadsworth ME. Growth in utero, blood pressure in childhood and adult life, and mortality from cardiovascular disease. *BMJ* 1989;**298**:564–567.
- Basile N, Vime P, Florensa M, Aparicio Ruiz B, Garcia Velasco JA, Remohi J, Meseguer M. The use of morphokinetics as a predictor of implantation: a multicentric study to define and validate an algorithm for embryo selection. *Hum Reprod* 2015;**30**:276–283.

- Biggers JD, Bell JE, Benos DJ. Mammalian blastocyst: transport functions in a developing epithelium. *Am J Physiol* 1988;**255**:C419–C432.
- Bowman P, McLaren A. Cleavage rate of mouse embryos in vivo and in vitro. *J Embryol Exp Morphol* 1970;**24**:203–207.
- Brison DR, Houghton FD, Falconer D, Roberts SA, Hawkhead J, Humpherson PG, Lieberman BA, Leese HJ. Identification of viable embryos in IVF by non-invasive measurement of amino acid turnover. *Hum Reprod* 2004;**19**:2319–2324.
- Chen X-K, Wen SW, Bottomley J, Smith GN, Leader A, Walker MC. In vitro fertilization is associated with an increased risk for preeclampsia. *Hypertens Pregnancy* 2009;**28**:1–12.
- Cummins JM, Breen TM, Harrison KL, Shaw JM, Wilson LM, Hennessey JF. A formula for scoring human embryo growth rates in in vitro fertilization: its value in predicting pregnancy and in comparison with visual estimates of embryo quality. *J In Vitro Fert Embryo Transf* 1986;**3**:284–295.
- Curchoe CL, Bormann CL. Artificial intelligence and machine learning for human reproduction and embryology presented at ASRM and ESHRE 2018. *J Assist Reprod Genet* 2019;**36**:591–600.
- Desai N, Goldberg JM, Austin C, Falcone T. Are cleavage anomalies, multinucleation, or specific cell cycle kinetics observed with time-lapse imaging predictive of embryo developmental capacity or ploidy? *Fertil Steril* 2018;**109**:665–674.
- Desai N, Ploskonka S, Goodman LR, Austin C, Goldberg J, Falcone T. Analysis of embryo morphokinetics, multinucleation and cleavage anomalies using continuous time-lapse monitoring in blastocyst transfer cycles. *Reprod Biol Endocrinol* 2014;**12**:54.
- Donohoe DR, Bultman SJ. Metaboloepigenetics: interrelationships between energy metabolism and epigenetic control of gene expression. *J Cell Physiol* 2012;**227**:3169–3177.
- Edwards RG, Fishel SB, Cohen J, Fehilly CB, Purdy JM, Slater JM, Steptoe PC, Webster JM. Factors influencing the success of in vitro fertilization for alleviating human infertility. *J In Vitro Fert Embryo Transf* 1984;**1**:3–23.
- Ferrick L, Lee YSL, Gardner DK. Reducing time to pregnancy and facilitating the birth of healthy children through functional analysis of embryo physiology. *Biol Reprod* 2019;**101**:1124–1139.
- Gangloff Y-G, Mueller M, Dann SG, Svoboda P, Sticker M, Spetz J-F, Um SH, Brown EJ, Cereghini S, Thomas G et al. Disruption of the mouse mTOR gene leads to early postimplantation lethality and prohibits embryonic stem cell development. *Mol Cell Biol* 2004;**24**:9508–9516.
- Gardner DK. Changes in requirements and utilization of nutrients during mammalian preimplantation embryo development and their significance in embryo culture. *Theriogenology* 1998;**49**:83–102.
- Gardner DK. Lactate production by the mammalian blastocyst: manipulating the microenvironment for uterine implantation and invasion? *Bioessays* 2015;**37**:364–371.
- Gardner DK. The impact of physiological oxygen during culture, and vitrification for cryopreservation, on the outcome of extended culture in human IVF. *Reprod Biomed Online* 2016;**32**:137–141.
- Gardner DK, Balaban B. Assessment of human embryo development using morphological criteria in an era of time-lapse, algorithms and 'OMICS': is looking good still important? *Mol Hum Reprod* 2016;**22**:704–718.
- Gardner DK, Harvey AJ. Blastocyst metabolism. *Reprod Fertil Dev* 2015;**27**:638–654.
- Gardner DK, Kelley RL. Impact of the IVF laboratory environment on human preimplantation embryo phenotype. *J Dev Orig Health Dis* 2017;**8**:418–435.
- Gardner DK, Lane M, Stevens J, Schlenker T, Schoolcraft WB. Blastocyst score affects implantation and pregnancy outcome: towards a single blastocyst transfer. *Fertil Steril* 2000;**73**:1155–1158.
- Gardner DK, Lane M, Stevens J, Schoolcraft WB. Noninvasive assessment of human embryo nutrient consumption as a measure of developmental potential. *Fertil Steril* 2001;**76**:1175–1180.
- Gardner DK, Leese HJ. Assessment of embryo viability prior to transfer by the noninvasive measurement of glucose uptake. *J Exp Zool* 1987;**242**:103–105.
- Gardner DK, Schoolcraft WB, Wagley L, Schlenker T, Stevens J, Hesla J. A prospective randomized trial of blastocyst culture and transfer in in-vitro fertilization. *Hum Reprod* 1998;**13**:3434–3440.
- Gardner DK, Surrey E, Minjarez D, Leitz A, Stevens J, Schoolcraft WB. Single blastocyst transfer: a prospective randomized trial. *Fertil Steril* 2004;**81**:551–555.
- Gardner DK, Wale PL. Analysis of metabolism to select viable human embryos for transfer. *Fertil Steril* 2013;**99**:1062–1072.
- Gardner DK, Wale PL, Collins R, Lane M. Glucose consumption of single post-compaction human embryos is predictive of embryo sex and live birth outcome. *Hum Reprod* 2011;**26**:1981–1986.
- Gerris J, De Neubourg D, Mangelschots K, Van Royen E, Van de Meerssche M, Valkenburg M. Prevention of twin pregnancy after in-vitro fertilization or intracytoplasmic sperm injection based on strict embryo criteria: a prospective randomized clinical trial. *Hum Reprod* 1999;**14**:2581–2587.
- González IM, Martin PM, Burdsal C, Sloan JL, Mager S, Harris T, Sutherland AE. Leucine and arginine regulate trophoblast motility through mTOR-dependent and independent pathways in the pre-implantation mouse embryo. *Dev Biol* 2012;**361**:286–300.
- Gott A, Hardy K, Winston R, Leese H. Non-invasive measurement of pyruvate and glucose uptake and lactate production by single human preimplantation embryos. *Hum Reprod* 1990;**5**:104–108.
- Guerif F, McKeegan P, Leese HJ, Sturmey RG. A simple approach for CO<sub>2</sub> consumption and RElease (CORE) analysis of metabolic activity in single mammalian embryos. *PLoS One* 2013;**8**:e67834.
- Guérin P, El Mouatassim S, Ménéz Y. Oxidative stress and protection against reactive oxygen species in the pre-implantation embryo and its surroundings. *Hum Reprod Update* 2001;**7**:175–189.
- Guertin DA, Stevens DM, Thoreen CC, Burds AA, Kalaany NY, Moffat J, Brown M, Fitzgerald KJ, Sabatini DM. Ablation in mice of the mTORC components raptor, rictor, or mLST8 reveals that mTORC2 is required for signaling to Akt-FOXO and PKC $\alpha$ , but not S6K1. *Dev Cell* 2006;**11**:859–871.
- Haigis MC, Sinclair DA. Mammalian sirtuins: biological insights and disease relevance. *Annu Rev Pathol* 2010;**5**:253–295.
- Hansen PJ. Exploitation of genetic and physiological determinants of embryonic resistance to elevated temperature to improve embryonic survival in dairy cattle during heat stress. *Theriogenology* 2007;**68**:S242–S249.
- Harbottle S, Hughes C, Cutting R, Roberts S, Brison D, Association Of Clinical Embryologists & The (ACE) British Fertility Society

- (BFS). Elective single embryo transfer: an update to UK best practice guidelines. *Hum Fertil* 2015;**18**:165–183.
- Harvey AJ, Rathjen J, Gardner DK. Metaboloeigenetic regulation of pluripotent stem cells. *Stem Cells Int* 2016;**2016**:1816525.
- Houghton FD, Hawkhead JA, Humpherson PG, Hogg JE, Balen AH, Rutherford AJ, Leese HJ. Non-invasive amino acid turnover predicts human embryo developmental capacity. *Hum Reprod* 2002;**17**:999–1005.
- Houtkooper RH, Cantó C, Wanders RJ, Auwerx J. The secret life of NAD<sup>+</sup>: an old metabolite controlling new metabolic signaling pathways. *Endocr Rev* 2010;**31**:194–223.
- Kelley RL, Gardner DK. Combined effects of individual culture and atmospheric oxygen on preimplantation mouse embryos in vitro. *Reprod Biomed Online* 2016;**33**:537–549.
- Kelley RL, Gardner DK. In vitro culture of individual mouse preimplantation embryos: the role of embryo density, microwells, oxygen, timing and conditioned media. *Reprod Biomed Online* 2017;**34**:441–454.
- Kelley RL, Gardner DK. Individual culture and atmospheric oxygen during culture affect mouse preimplantation embryo metabolism and post-implantation development. *Reprod Biomed Online* 2019;**39**:3–18.
- Lane M, Gardner DK. Selection of viable mouse blastocysts prior to transfer using a metabolic criterion. *Hum Reprod* 1996;**11**:1975–1978.
- Lane M, Gardner DK. Amino acids and vitamins prevent culture-induced metabolic perturbations and associated loss of viability of mouse blastocysts. *Hum Reprod* 1998;**13**:991–997.
- Lane M, Gardner DK. Lactate regulates pyruvate uptake and metabolism in the preimplantation mouse embryo. *Biol Reprod* 2000;**62**:16–22.
- Lane M, Gardner DK. Understanding cellular disruptions during early embryo development that perturb viability and fetal development. *Reprod Fertil Dev* 2005;**17**:371–378.
- Lee YSL, Thouas GA, Gardner DK. Developmental kinetics of cleavage stage mouse embryos are related to their subsequent carbohydrate and amino acid utilization at the blastocyst stage. *Hum Reprod* 2015;**30**:543–552.
- Lees JG, Gardner DK, Harvey AJ. Nicotinamide adenine dinucleotide induces a bivalent metabolism and maintains pluripotency in human embryonic stem cells. *Stem Cells* 2020;**38**:624–638.
- Leese HJ. Metabolism of the preimplantation mammalian embryo. *Oxf Rev Reprod Biol* 1991;**13**:35–72.
- Leese HJ. Quiet please, do not disturb: a hypothesis of embryo metabolism and viability. *Bioessays* 2002;**24**:845–849.
- Leese HJ, Barton AM. Pyruvate and glucose uptake by mouse ova and preimplantation embryos. *J Reprod Fertil* 1984;**72**:9–13.
- Leese HJ, Guerif F, Allgar V, Brison DR, Lundin K, Sturmey RG. Biological optimization, the Goldilocks principle, and how much is lagom in the preimplantation embryo. *Mol Reprod Dev* 2016;**83**:748–754.
- Liu Y, Chapple V, Feenan K, Roberts P, Matson P. Time-lapse deselection model for human day 3 in vitro fertilization embryos: the combination of qualitative and quantitative measures of embryo growth. *Fertil Steril* 2016;**105**:656–662.e1.
- Liu Y, Chapple V, Roberts P, Matson P. Prevalence, consequence, and significance of reverse cleavage by human embryos viewed with the use of the Embryoscope time-lapse video system. *Fertil Steril* 2014;**102**:1295–1300.e2.
- Luke B, Bigger HR, Leurgans S, Sietsema D. The cost of prematurity: a case-control study of twins vs singletons. *Am J Public Health* 1996;**86**:809–814.
- Martin PM, Sutherland AE, Van Winkle LJ. Amino acid transport regulates blastocyst implantation. *Biol Reprod* 2003;**69**:1101–1108.
- Meseguer M, Herrero J, Tejera A, Hilligsøe KM, Ramsing NB, Remohí J. The use of morphokinetics as a predictor of embryo implantation. *Hum Reprod* 2011;**26**:2658–2671.
- Milewski R, Kuć P, Kuczyńska A, Stankiewicz B, Lukaszuk K, Kuczyński W *et al.* A predictive model for blastocyst formation based on morphokinetic parameters in time-lapse monitoring of embryo development. *J Assist Reprod Genet* 2015;**32**:571–579.
- Mitchell M, Cashman KS, Gardner DK, Thompson JG, Lane M. Disruption of mitochondrial malate-aspartate shuttle activity in mouse blastocysts impairs viability and fetal growth. *Biol Reprod* 2009;**80**:295–301.
- Miyagi Y, Habara T, Hirata R, Hayashi N. Feasibility of predicting live birth by combining conventional embryo evaluation with artificial intelligence applied to a blastocyst image in patients classified by age. *Reprod Med Biol* 2019;**18**:344–356.
- Montag M, Liebenthron J, Köster M. Which morphological scoring system is relevant in human embryo development? *Placenta* 2011;**32**:S252–S256.
- Morgan MJ, Faik P. Carbohydrate metabolism in cultured animal cells. *Biosci Rep* 1981;**1**:669–686.
- Niederberger C, Pellicer A, Simon C, Kathrins M, Goldstein M, Sigman M, Schlegel PN, Munné S, Gardner DK, Cobo A. 25 historic papers: an ASRM 75th birthday gift from fertility and sterility. *Fertil Steril* 2019;**112**:e2–e27.
- Ombelet W, De Sutter P, Van der Elst J, Martens G. Multiple gestation and infertility treatment: registration, reflection and reaction—the Belgian project. *Hum Reprod Update* 2005;**11**:3–14.
- Paternot G, Debrock S, D’Hooghe T, Spiessens C. Computer-assisted embryo selection: a benefit in the evaluation of embryo quality? *Reprod Biomed Online* 2011;**23**:347–354.
- Penzias A, Bendikson K, Butts S, Coutifaris C, Fossum G, Falcone T, Gitlin S, Gracia C, Hansen K, La Barbera A. Guidance on the limits to the number of embryos to transfer: a committee opinion. *Fertil Steril* 2017;**107**:901–903.
- Petersen BM, Boel M, Montag M, Gardner DK. Development of a generally applicable morphokinetic algorithm capable of predicting the implantation potential of embryos transferred on Day 3. *Hum Reprod* 2016;**31**:2231–2244.
- Picton HM, Elder K, Houghton FD, Hawkhead JA, Rutherford AJ, Hogg JE, Leese HJ, Harris SE. Association between amino acid turnover and chromosome aneuploidy during human preimplantation embryo development in vitro. *Mol Hum Reprod* 2010;**16**:557–569.
- Reignier A, Girard J-M, Lammers J, Chtourou S, Lefebvre T, Barriere P, Freour T. Performance of Day 5 KIDScore<sup>TM</sup> morphokinetic prediction models of implantation and live birth after single blastocyst transfer. *J Assist Reprod Genet* 2019;**36**:2279–2285.
- Reitzer LJ, Wice B, Kennell D. The pentose cycle. Control and essential function in HeLa cell nucleic acid synthesis. *J Biol Chem* 1980;**255**:5616–5626.

- Renard JP, Philippon A, Menezo Y. In-vitro uptake of glucose by bovine blastocysts. *J Reprod Fertil* 1980;**58**:161–164.
- Rubio I, Galán A, Larreategui Z, Ayerdi F, Bellver J, Herrero J, Meseguer M. Clinical validation of embryo culture and selection by morphokinetic analysis: a randomized, controlled trial of the EmbryoScope. *Fertil Steril* 2014;**102**:1287–1294.e5.
- Rubio I, Kuhlmann R, Agerholm I, Kirk J, Herrero J, Escibá MJ, Bellver J, Meseguer M. Limited implantation success of direct-cleaved human zygotes: a time-lapse study. *Fertil Steril* 2012;**98**:1458–1463.
- Santos Filho E, Noble JA, Poli M, Griffiths T, Emerson G, Wells D. A method for semi-automatic grading of human blastocyst microscope images. *Hum Reprod* 2012;**27**:2641–2648.
- Shapiro BS, Daneshmand ST, Garner FC, Aguirre M, Thomas S. Large blastocyst diameter, early blastulation, and low preovulatory serum progesterone are dominant predictors of clinical pregnancy in fresh autologous cycles. *Fertil Steril* 2008;**90**:302–309.
- Storr A, Venetis CA, Cooke S, Kilani S, Ledger W. Inter-observer and intra-observer agreement between embryologists during selection of a single Day 5 embryo for transfer: a multicenter study. *Hum Reprod* 2017;**32**:307–314.
- Sturmey RG, Reis A, Leese HJ, McEvoy TG. Role of fatty acids in energy provision during oocyte maturation and early embryo development. *Reprod Domest Anim* 2009;**44**:50–58.
- Takehima K, Jwa SC, Saito H, Nakaza A, Kuwahara A, Ishihara O, Irahara M, Hirahara F, Yoshimura Y, Sakumoto T. Impact of single embryo transfer policy on perinatal outcomes in fresh and frozen cycles—analysis of the Japanese Assisted Reproduction Technology registry between 2007 and 2012. *Fertil Steril* 2016;**105**:337–346.e3.
- Tatone C, Di Emidio G, Barbonetti A, Carta G, Luciano AM, Falone S, Amicarelli F. Sirtuins in gamete biology and reproductive physiology: emerging roles and therapeutic potential in female and male infertility. *Hum Reprod Update* 2018;**24**:267–289.
- Thirumalaraju P, Hsu J, Bormann C, Kanakasabapathy M, Souter I, Dimitriadis I, Dickinson K, Pooniwalla R, Gupta R, Yogesh V. Deep learning-enabled blastocyst prediction system for cleavage stage embryo selection. *Fertil Steril* 2019;**111**:e29.
- Thompson JG, Partridge RJ, Houghton FD, Cox CI, Leese HJ. Oxygen uptake and carbohydrate metabolism by in vitro derived bovine embryos. *J Reprod Fertil* 1996;**106**:299–306.
- Tran D, Cooke S, Illingworth P, Gardner DK. Deep learning as a predictive tool for fetal heart pregnancy following time-lapse incubation and blastocyst transfer. *Hum Reprod* 2019;**34**:1011–1018.
- Turner K, Martin KL, Woodward BJ, Lenton EA, Leese HJ. Comparison of pyruvate uptake by embryos derived from conception and non-conception natural cycles. *Hum Reprod* 1994;**9**:2362–2366.
- Umaoka Y, Noda Y, Narimoto K, Mori T. Effects of oxygen toxicity on early development of mouse embryos. *Mol Reprod Dev* 1992;**31**:28–33.
- Van Royen E, Mangelschots K, De Neubourg D, Valkenburg M, Van de Meerssche M, Ryckaert G, Eestermans W, Gerris J. Characterization of a top quality embryo, a step towards single-embryo transfer. *Hum Reprod* 1999;**14**:2345–2349.
- VerMilyea MD, Tan L, Anthony JT, Conaghan J, Ivani K, Gvakharina M, Boostanfar R, Baker VL, Suraj V, Chen AA et al. Computer-automated time-lapse analysis results correlate with embryo implantation and clinical pregnancy: a blinded, multi-centre study. *Reprod Biomed Online* 2014;**29**:729–736.
- Wale PL, Gardner DK. Oxygen regulates amino acid turnover and carbohydrate uptake during the preimplantation period of mouse embryo development. *Biol Reprod* 2012;**87**:21–28.
- Wale PL, Gardner DK. The effects of chemical and physical factors on mammalian embryo culture and their importance for the practice of assisted human reproduction. *Hum Reprod Update* 2016;**22**:2–22.
- Watson AJ, Kidder GM, Schultz GA. How to make a blastocyst. *Biochem Cell Biol* 1992;**70**:849–855.
- Watson AJ, Pape C, Emanuel JR, Levenson R, Kidder GM. Expression of NA, K-ATPase  $\alpha$  and  $\beta$  subunit genes during preimplantation development of the mouse. *Dev Genet* 1990;**11**:41–48.
- Wong CC, Loewke KE, Bossert NL, Behr B, De Jonge CJ, Baer TM, Pera RAR. Non-invasive imaging of human embryos before embryonic genome activation predicts development to the blastocyst stage. *Nat Biotechnol* 2010;**28**:1115.
- Zander-Fox DL, Mitchell M, Thompson JG, Lane M. Alterations in mouse embryo intracellular pH by DMO during culture impair implantation and fetal growth. *Reprod Biomed Online* 2010;**21**:219–229.
- Zhang D, Tang Z, Huang H, Zhou G, Cui C, Weng Y, Liu W, Kim S, Lee S, Perez-Neut M et al. Metabolic regulation of gene expression by histone lactylation. *Nature* 2019;**574**:575–580.
- Zhu J, Tsai H-J, Gordon MR, Li R. Cellular stress associated with aneuploidy. *Dev Cell* 2018;**44**:420–431.
